# Supplementary material for: SiO2-coated LiNi0.915Co0.075Al0.01O2cathode material for rechargeable Li-ion batteries
Source: Royal Society of Chemistry journal article supplement (doi:10.1039/c6nr07438c), 2016-01-01
Supplement: c6nr07438c1.pdf [file c6nr07438c1.pdf]

## Supporting information

### SiO<sub>2</sub>-coated LiNi<sub>0.915</sub>Co<sub>0.075</sub>Al<sub>0.01</sub>O<sub>2</sub> cathode material for rechargeable Li-ion batteries

Pengfei Zhou, Zhen Zhang, Huanju Meng, Yanying Lu, Jun Cao, Fangyi Cheng,  
Zhanliang Tao\*, Jun Chen\*

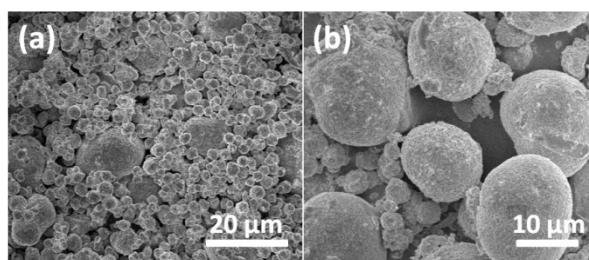

Fig. S1. SEM images of pristine NCA.

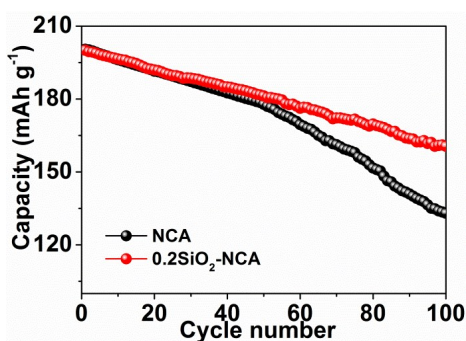

Fig. S2. Cycling performance of pristine NCA and 0.2SiO<sub>2</sub>-NCA.

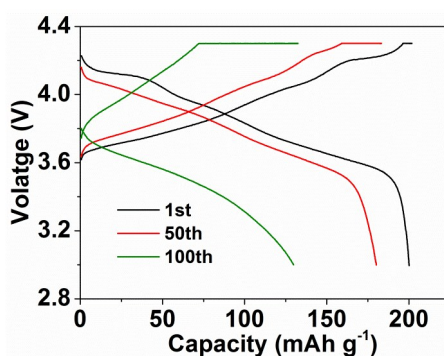

Fig. S3. Typical charge/discharge curves of pristine NCA.

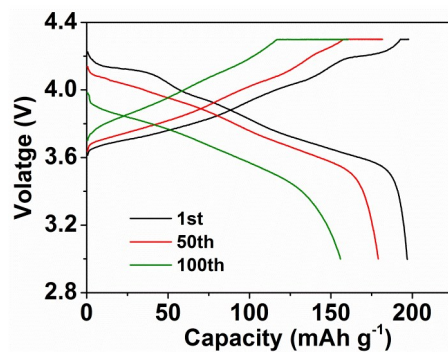

**Fig. S4.** Typical charge/discharge curves of 0.2SiO<sub>2</sub>-NCA.

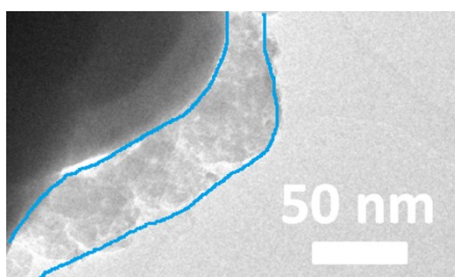

**Fig. S5.** TEM images of 0.2SiO<sub>2</sub>-NCA after cycles.
